# Supplementary material for: Selective Oxidation of Styrene to Benzaldehyde by Co‐Ag Codoped ZnO Catalyst and H2O2 as Oxidant
Source: Hindawi journal article supplement (doi:10.1155/2018/2716435), 2018-01-01

## Supplementary information

### Supplementary data 1. Catalytic oxidation of styrene.

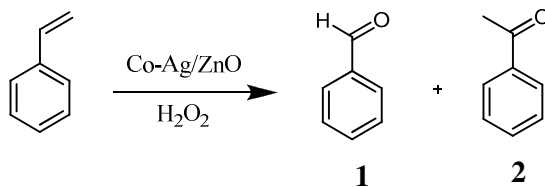

### Supplementary data 2. TG and DTG curves of C4

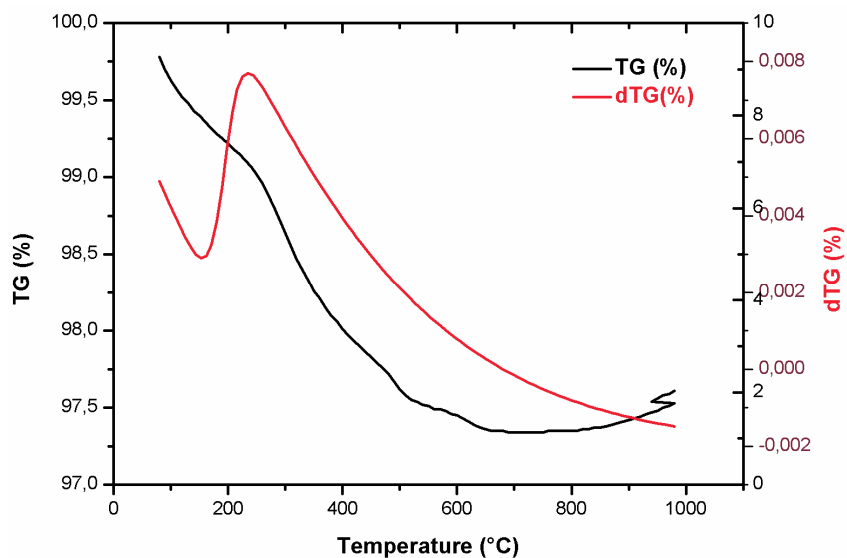

### Supplementary data 3. $\text{N}_2$ adsorption-desorption isotherm and BJH pore diameter distribution of C4

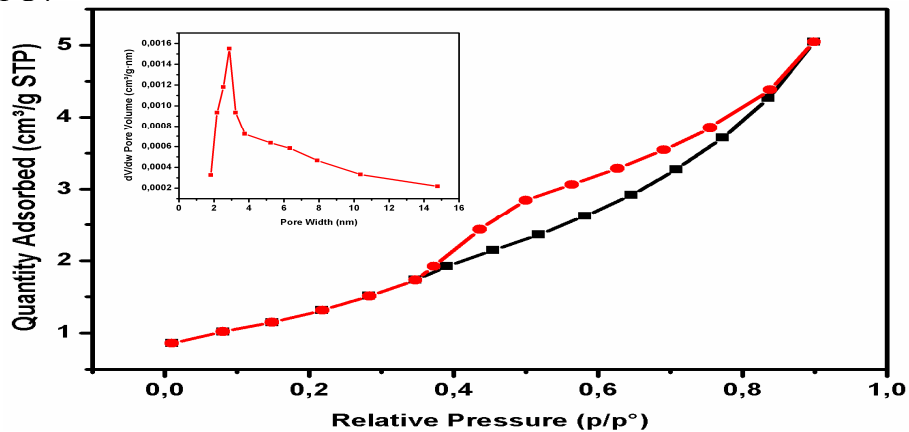

**Supplementary data 4.** FT-IR spectrum of C<sub>4</sub>

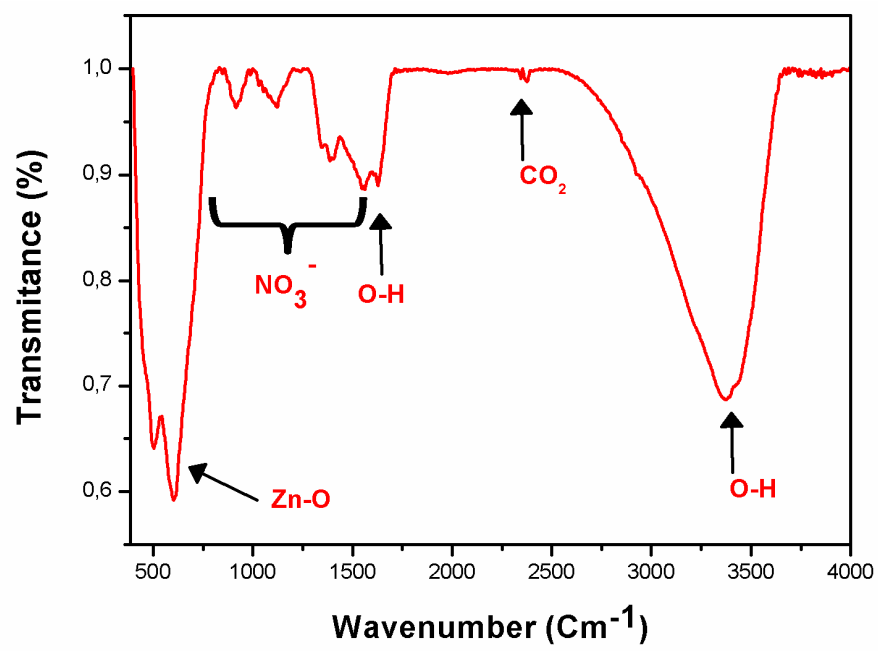

**Supplementary data 5.** SEM images and EDX spectra of: (a): C<sub>1</sub>; (b): C<sub>2</sub>; (c) C<sub>3</sub>; (d): C<sub>4</sub>; (e): C<sub>5</sub>, (f): C<sub>6</sub>; (g): 1<sup>st</sup> Cycle, (h): 2<sup>nd</sup> Cycle, (i): 3<sup>th</sup> Cycle and (j): 4<sup>th</sup> cycles of reused catalyst.

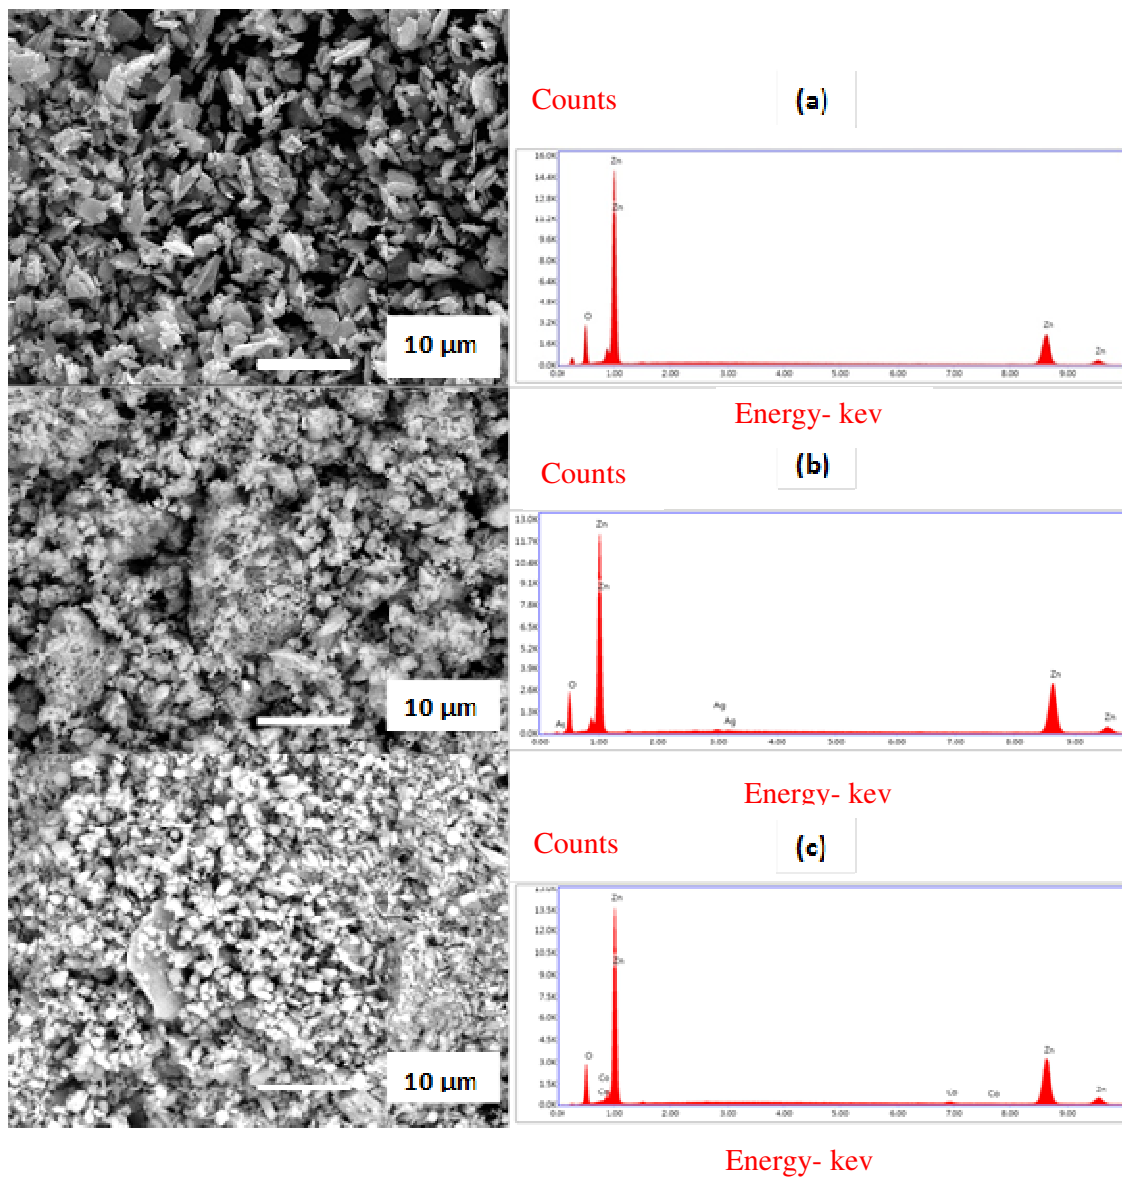

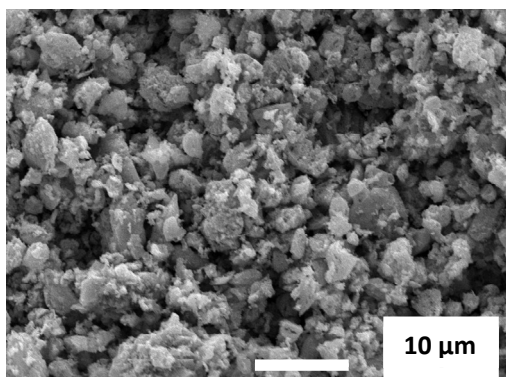

Counts ) (d)

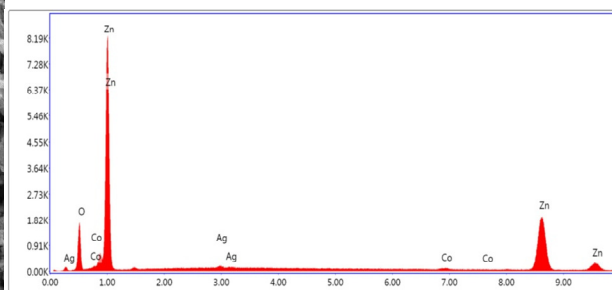

Energy- keV

Counts (e)

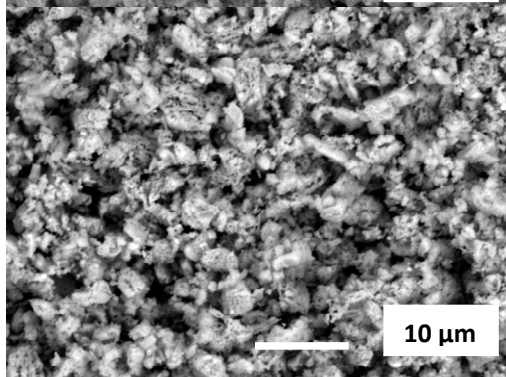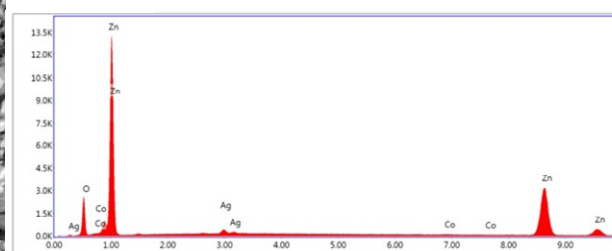

Energy- keV

Counts (f)

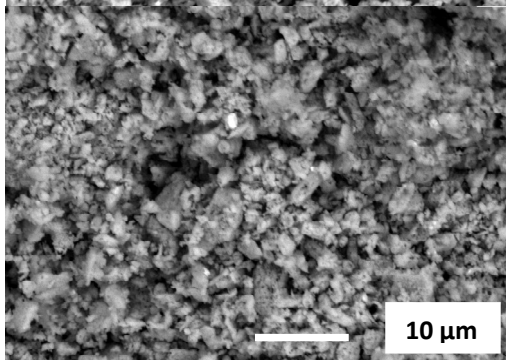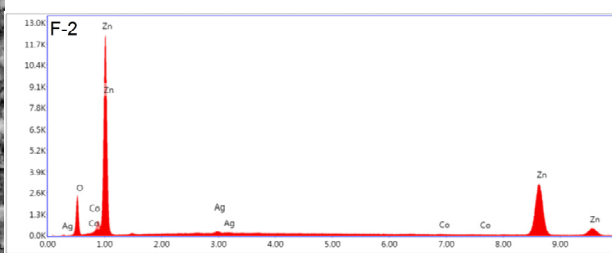

Energy- keV

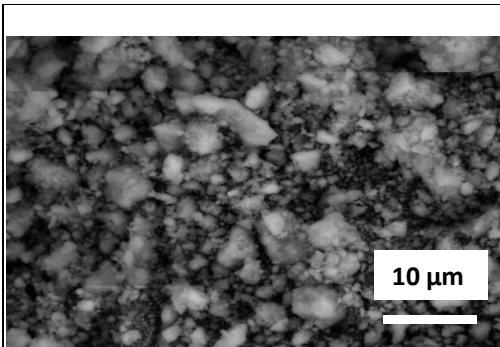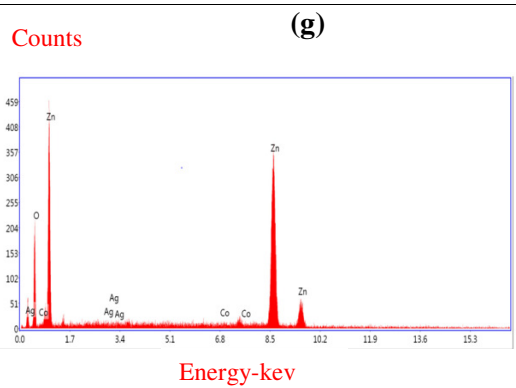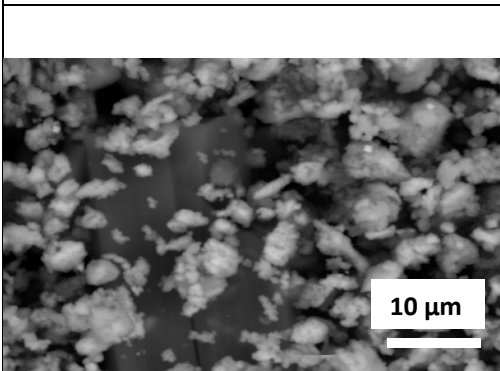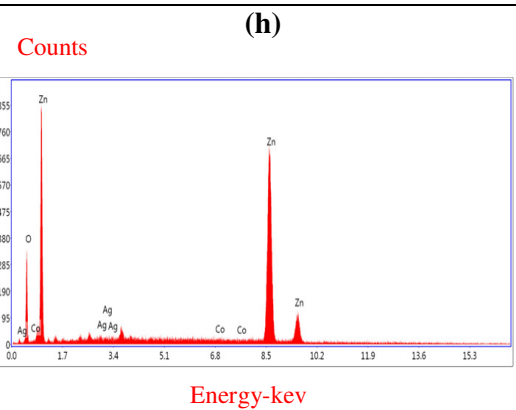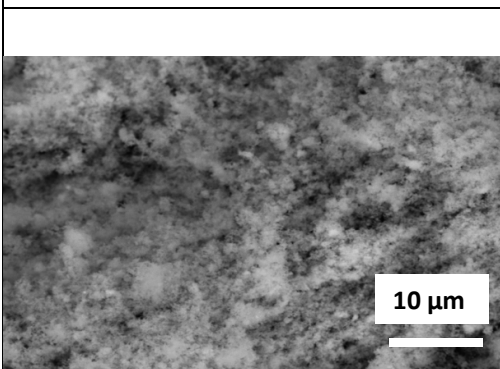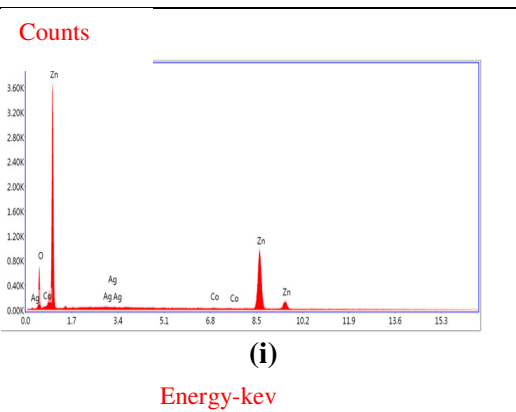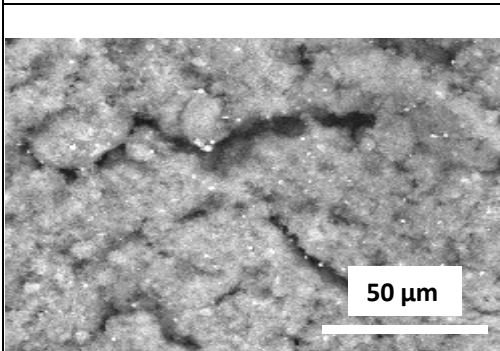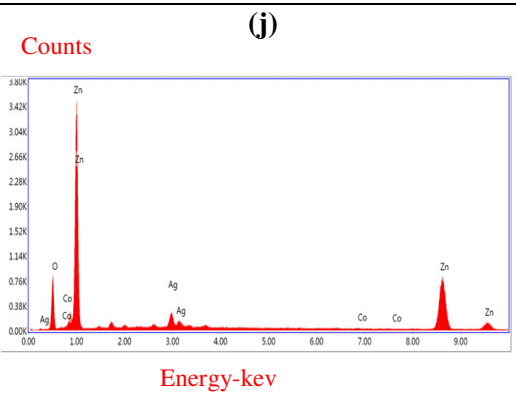

Supplement: f1 [file 2716435.f1.pdf]
